# Supplementary material
Source: PubMed Central journal article supplement (PMC5334195)
Supplement: NIHMS850675-supplement-10549_2017_4139_MOESM1_ESM.pdf [file NIHMS850675-supplement-10549_2017_4139_MOESM1_ESM.pdf]

Supplementary Figure 1

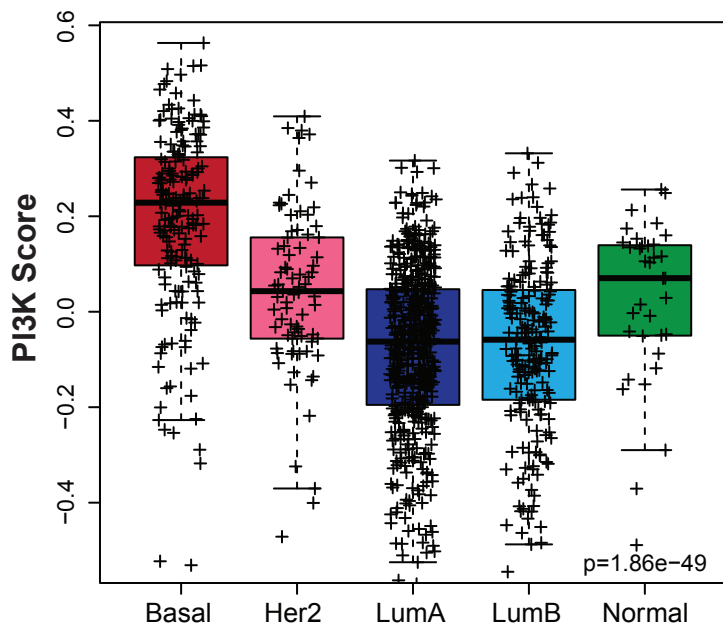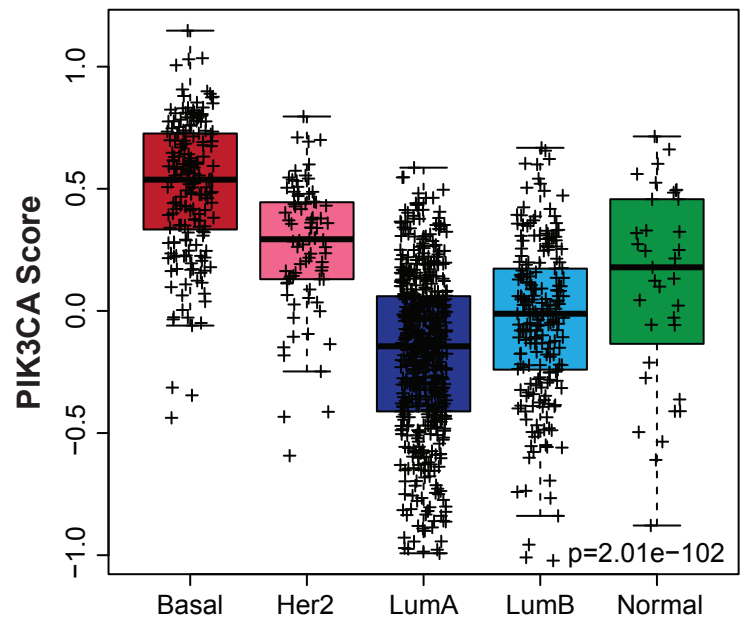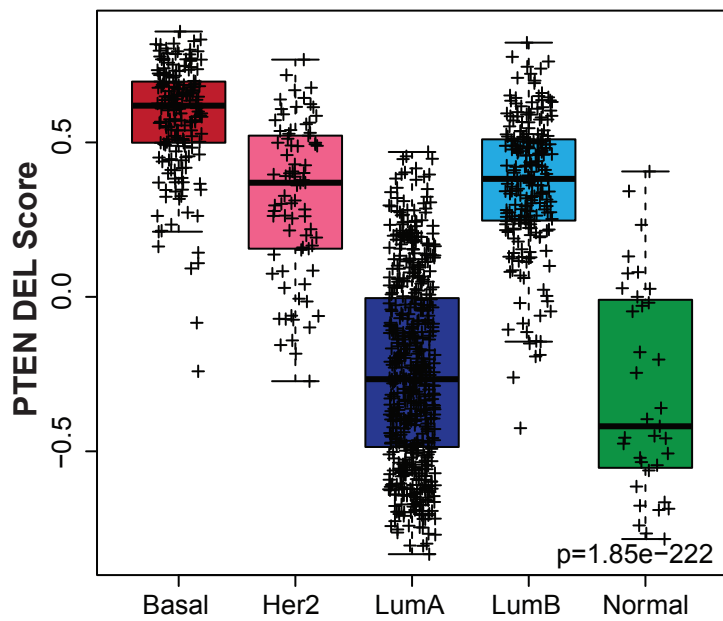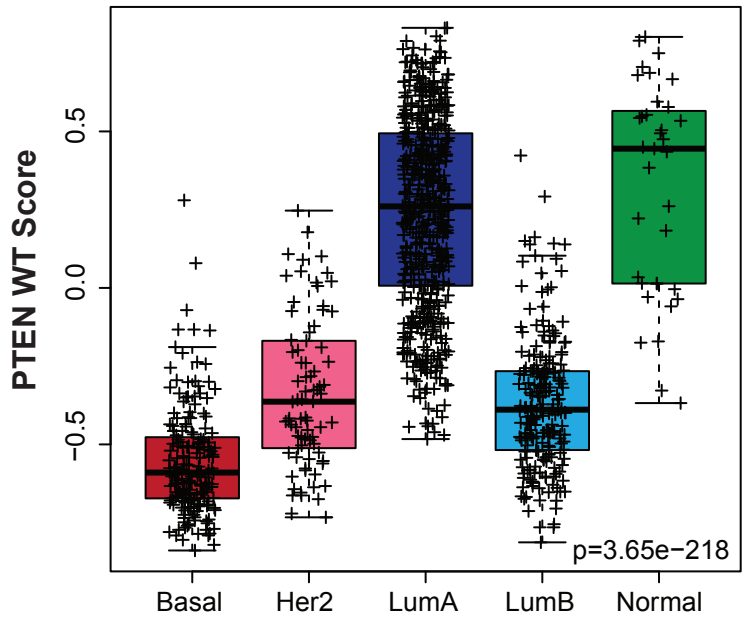

| Subtype Comparison    | PI3K     | PIK3CA   | PTEN DEL  | PTEN WT   |
|-----------------------|----------|----------|-----------|-----------|
| Basal vs Other        | 1.50E-45 | 6.60E-77 | 1.30E-78  | 4.20E-72  |
| HER2 vs. Other        | 1.30E-02 | 2.50E-08 | 7.30E-08  | 7.50E-09  |
| LumA vs. Other        | 4.80E-21 | 7.10E-57 | 2.00E-163 | 4.50E-162 |
| LumB vs. Other        | 4.00E-04 | 7.21E-02 | 2.80E-30  | 3.40E-32  |
| Normal-like vs. Other | 1.61E-01 | 1.53E-01 | 3.30E-07  | 1.10E-07  |
