# Supplementary material
Source: PubMed Central journal article supplement (PMC5334195)
Supplement: NIHMS850675-supplement-10549_2017_4139_MOESM5_ESM.pdf [file NIHMS850675-supplement-10549_2017_4139_MOESM5_ESM.pdf]

## Supplementary Figure 5

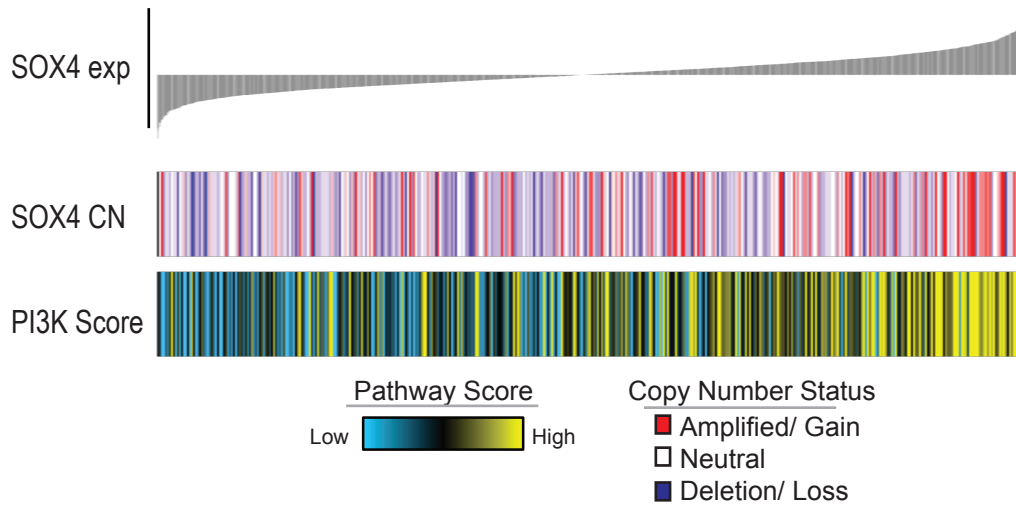

### Statistical Analyses

SOX4 exp vs. SOX4 CN:  $r= 0.42$ ,  $p=2.6e-87$   
SOX4 exp vs. PI3K Score:  $r=0.23$ ,  $p=1.1e-24$   
SOX4 CN vs. PI3K Score:  $r=0.27$ ,  $p=1.5e-34$
