# Supplementary material
Source: PubMed Central journal article supplement (PMC5334195)

Supplementary Figure 2

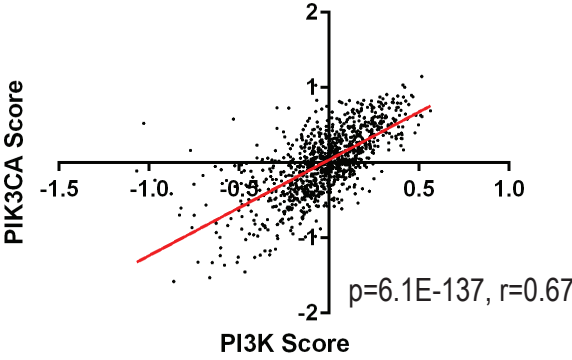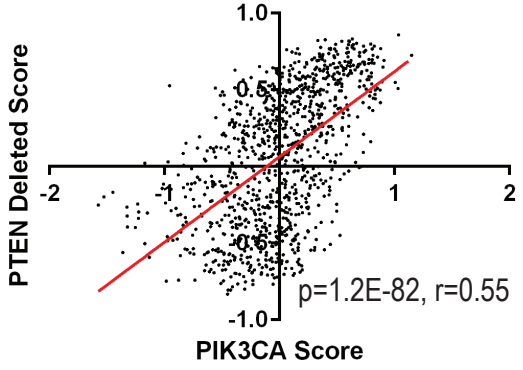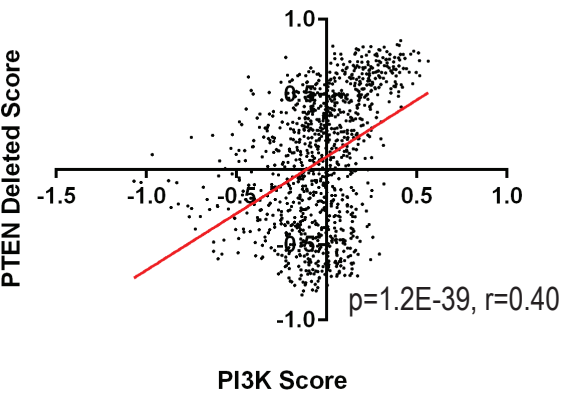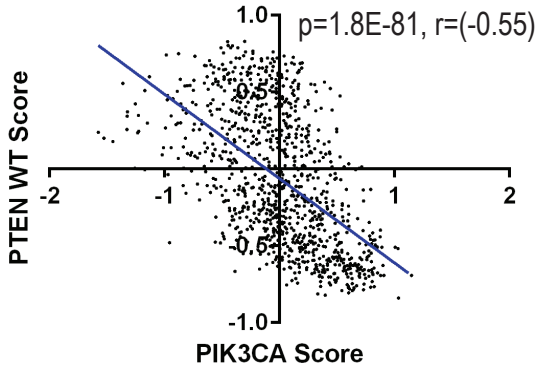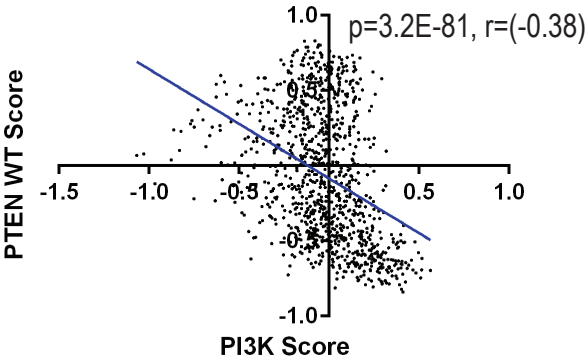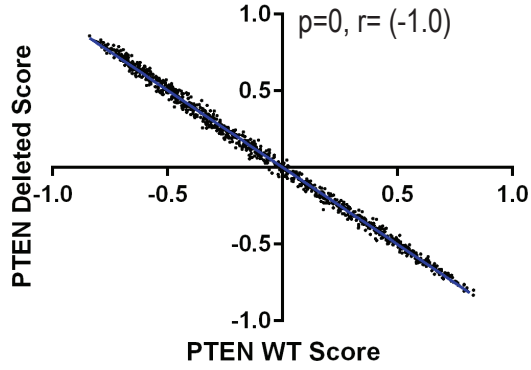

Supplement: NIHMS850675-supplement-10549_2017_4139_MOESM2_ESM.pdf [file NIHMS850675-supplement-10549_2017_4139_MOESM2_ESM.pdf]

Supplementary Figure 3

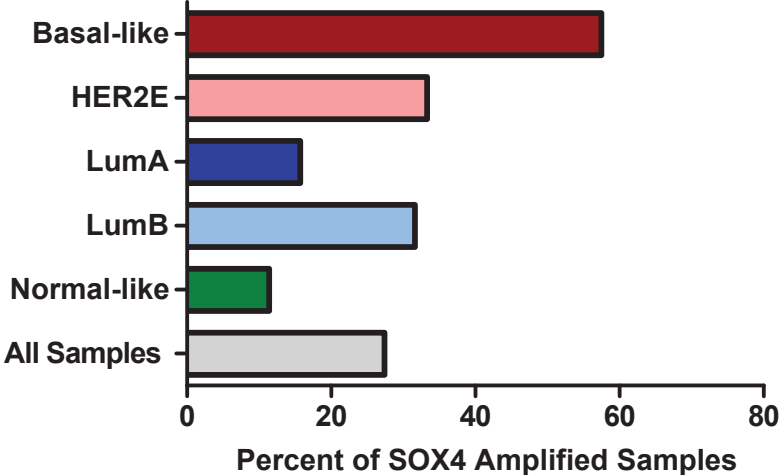

Supplement: NIHMS850675-supplement-10549_2017_4139_MOESM3_ESM.pdf [file NIHMS850675-supplement-10549_2017_4139_MOESM3_ESM.pdf]

Supplementary Figure 4

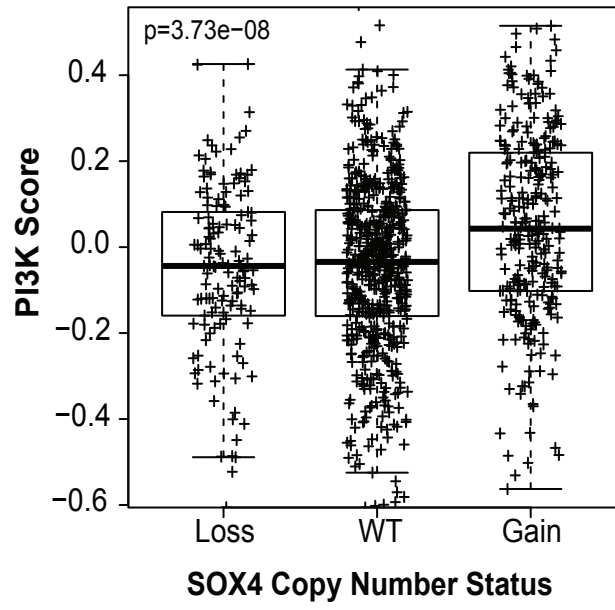

Supplement: NIHMS850675-supplement-10549_2017_4139_MOESM4_ESM.pdf [file NIHMS850675-supplement-10549_2017_4139_MOESM4_ESM.pdf]

Supplementary Figure 6

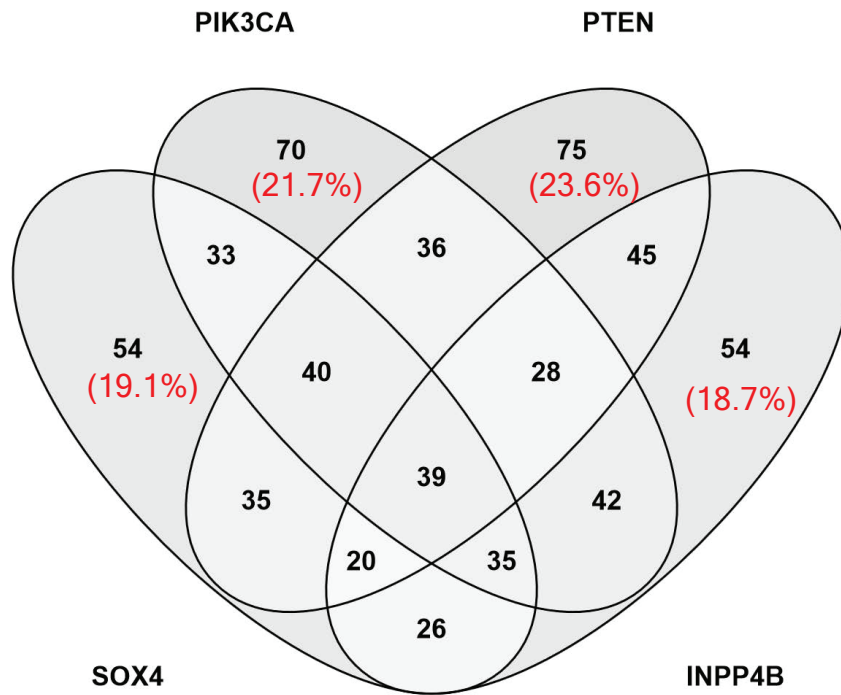

Supplement: NIHMS850675-supplement-10549_2017_4139_MOESM6_ESM.pdf [file NIHMS850675-supplement-10549_2017_4139_MOESM6_ESM.pdf]

Supplementary Figure 7

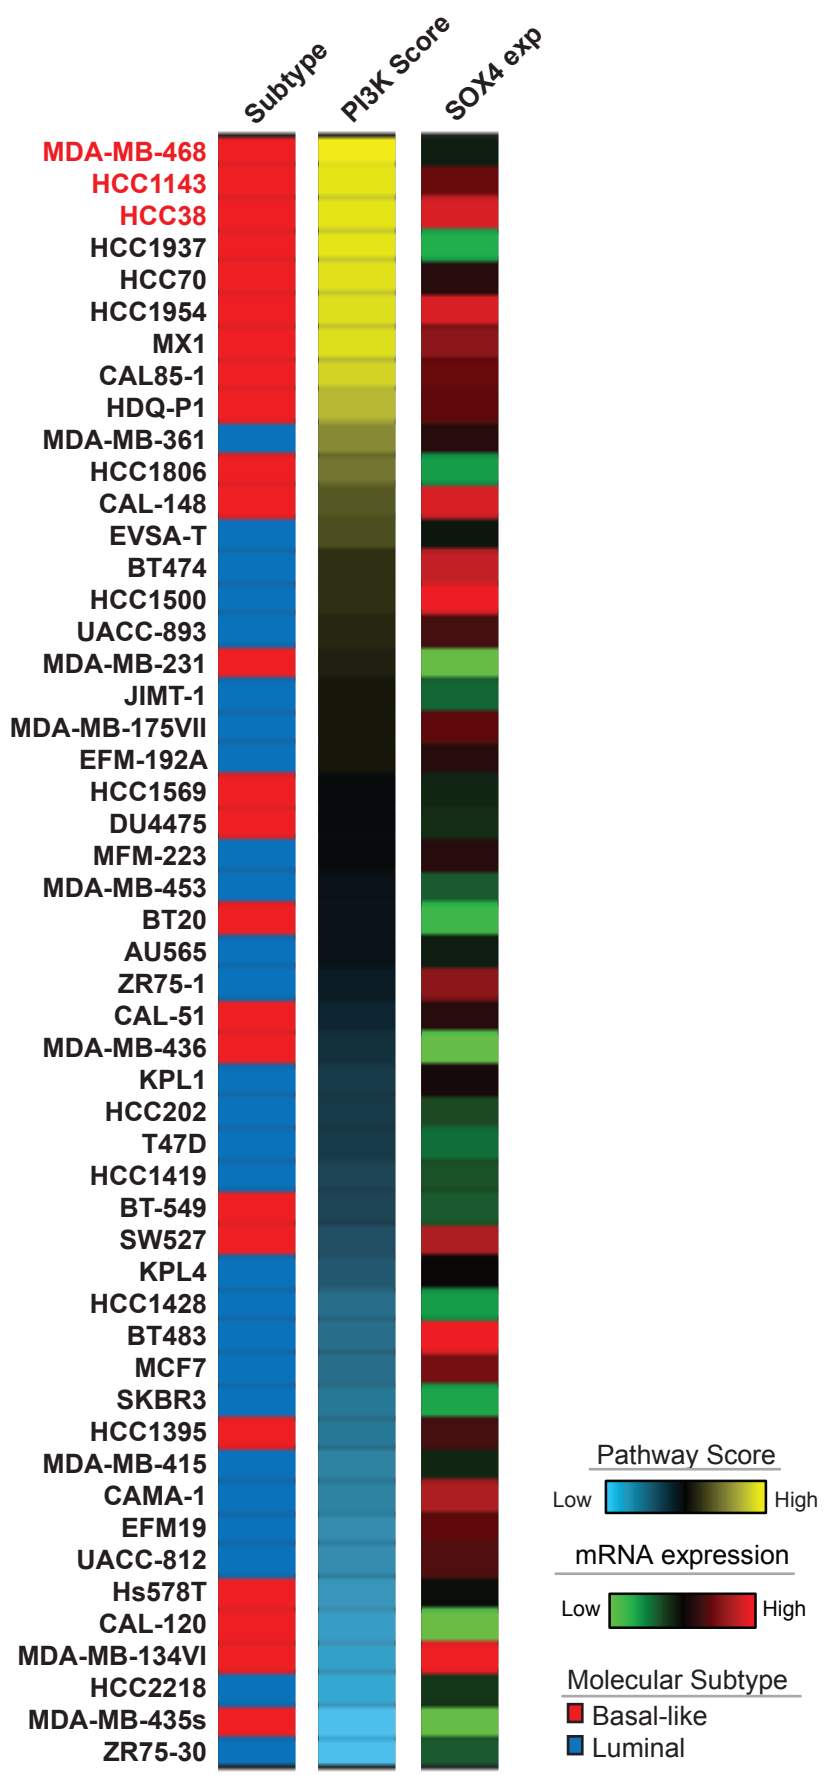

Supplement: NIHMS850675-supplement-10549_2017_4139_MOESM7_ESM.pdf [file NIHMS850675-supplement-10549_2017_4139_MOESM7_ESM.pdf]

## Supplementary Figure 8

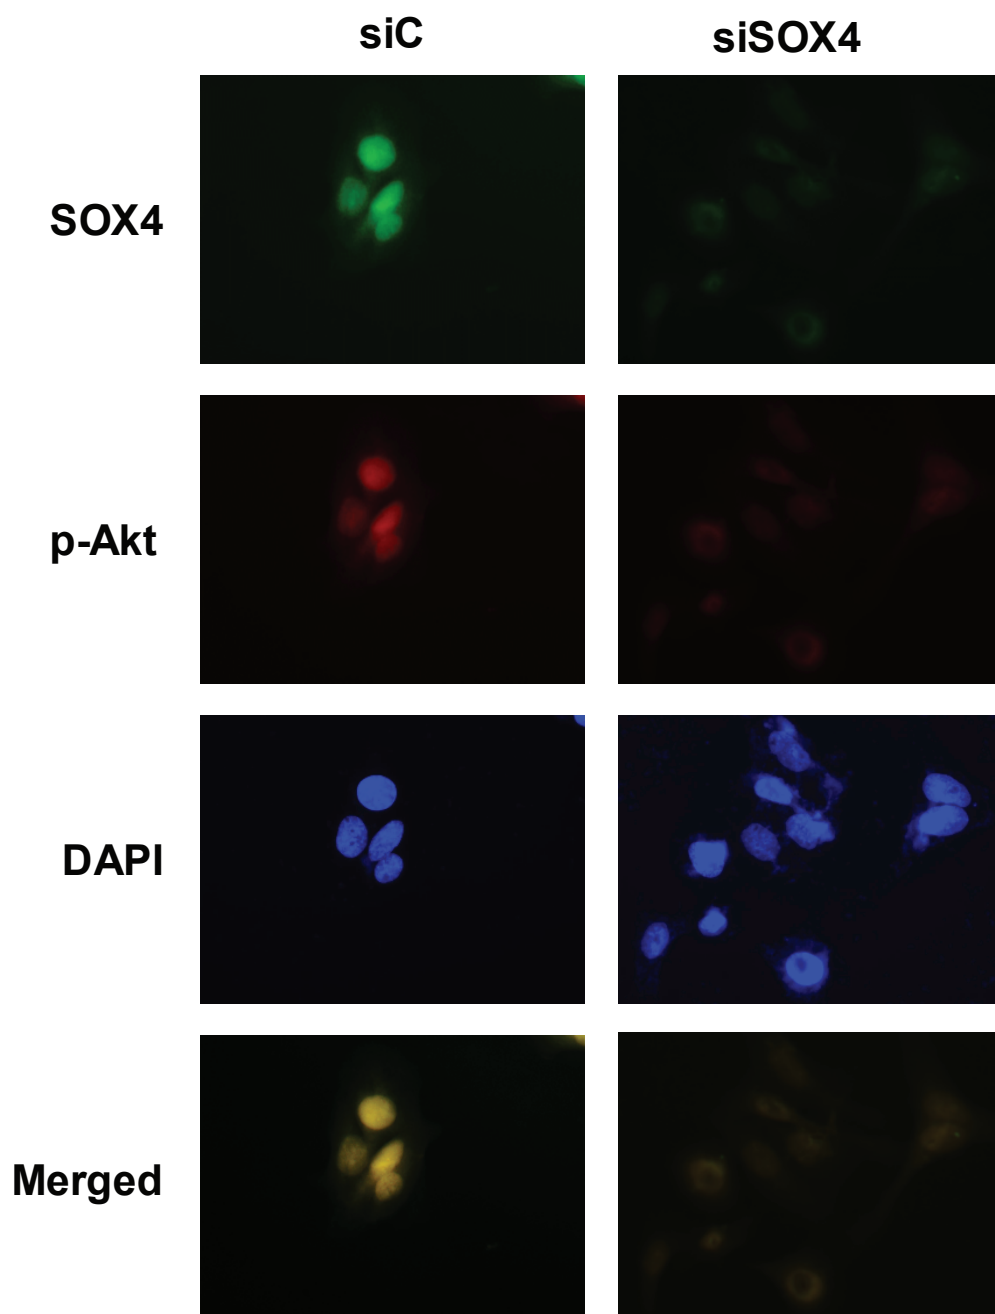

Supplement: NIHMS850675-supplement-10549_2017_4139_MOESM8_ESM.pdf [file NIHMS850675-supplement-10549_2017_4139_MOESM8_ESM.pdf]
